# Supplementary material
Source: PubMed Central journal article supplement (PMC6424615)
Supplement: NIHMS1520516-supplement-1.pdf [file NIHMS1520516-supplement-1.pdf]

**Table S1, related to Figure 1.**

| Case # | WHO grade <sup>a</sup> | Age <sup>b</sup> | Gender <sup>c</sup> | Tumor location <sup>d</sup>    | KPS <sup>e</sup> | GBM subtype       |
|--------|------------------------|------------------|---------------------|--------------------------------|------------------|-------------------|
| 74     | IV                     | 74               | M                   | L frontal, parietal            | 40%              | classic           |
| 194    | IV                     | 71               | M                   | L parietal, temporal           | 80%              | classic           |
| 216    | IV                     | 67               | F                   | L parietal, occipital          | 40%              | not determined    |
| 269    | IV                     | 65               | F                   | R frontal                      | ND               | classic           |
| 317    | IV                     | 71               | F                   | R temporal                     | 50%              | not determined    |
| 356    | IV                     | 74               | M                   | R frontal, temporal, insula    | 70%              | classic           |
| 384    | IV                     | 45               | M                   | R parietal, temporal, midbrain | 50%              | not determined    |
| 391    | IV                     | 54               | F                   | R parietal, temporal           | 50%              | mesenchymal       |
| 397    | IV                     | 58               | F                   | L parietal, frontal            | 90%              | R132H - proneural |
| 435    | IV                     | 34               | M                   | L parietal, frontal            | 50%              | not determined    |
| 442    | IV                     | 68               | M                   | R frontal, temporal, parietal  | 50%              | not determined    |
| 485    | IV                     | 67               | M                   | R parietal, temporal           | 60%              | classic           |
| 496    | IV                     | 57               | F                   | R parietal, temporal           | 70%              | classic           |
| 498    | IV                     | 17               | F                   | R frontal, parietal, temporal  | 30%              | classic           |
| 510    | IV                     | 56               | M                   | R parietal                     | 50%              | not determined    |
| 522    | IV                     | 48               | M                   | L temporal                     | 100%             | R132H - proneural |
| 592    | IV                     | 45               | M                   | L parietal, frontal            | 80%              | proneural         |
| 1103   | IV                     | 54               | M                   |                                | ND               | mesenchymal       |
| 1124   | IV                     | 63               | M                   | R parietal, temporal, insula   | 50%              | Classic           |

<sup>a</sup>, non-neoplastic; II, low-grade astrocytoma; III, anaplastic astrocytoma; IV, glioblastoma (GBM).

<sup>b</sup>, Age at diagnosis was calculated from date of birth to date of surgery.

<sup>c</sup>, M, Male; F, Female.

<sup>d</sup>, L, Left; R, Right.

<sup>e</sup>, Karnofsky Performance Status. Patients are classified according to their functional impairment level, where 100% as normal and 0% as dead.

**Table S2, related to Figure 1**

| Name   | PTEN Expr | FGFR1 Expr | FGFR2 Expr | FGFR3 Expr | PTEN Mutation | PTEN protein | Radiation Response |
|--------|-----------|------------|------------|------------|---------------|--------------|--------------------|
| GSC295 | 6.9       | 15.3       | 15.3       | 15.3       |               |              | Sensitive          |
| GSC2   | 6.3       | 8.9        | 8.9        | 8.9        |               |              | Resistant          |
| GS10-6 | 6.2       | 10.9       | 10.9       | 10.9       |               |              | Resistant          |
| GSC296 | 5.8       | 14.1       | 14.1       | 14.1       |               |              | Resistant          |
| GS5-22 | 5.7       | 11.5       | 11.5       | 11.5       |               |              | Sensitive          |
| GSC112 | 4.7       | 6.9        | 6.9        | 6.9        |               |              | Sensitive          |
| GS4-16 | 4.7       | 11.0       | 11.0       | 11.0       |               |              | Resistant          |
| GS3-25 | 4.6       | 7.8        | 7.8        | 7.8        |               |              | intermediate       |
| GSC304 | 4.5       | 12.4       | 12.4       | 12.4       |               |              | Resistant          |
| GSC300 | 4.0       | 10.6       | 10.6       | 10.6       |               |              | Resistant          |
| GS7-2  | 3.7       | 15.8       | 15.8       | 15.8       |               |              | Resistant          |
| GSC264 | 3.6       | 17.7       | 17.7       | 17.7       |               |              | intermediate       |
| GS7-11 | 3.4       | 4.2        | 4.2        | 4.2        | Missense      | I33F         | Sensitive          |
| GSC107 | 3.4       | 5.9        | 5.9        | 5.9        |               |              | Resistant          |
| GS7-10 | 3.2       | 6.4        | 6.4        | 6.4        | Missense      | Y68H         | intermediate       |
| GSC289 | 3.1       | 17.8       | 17.8       | 17.8       |               |              | intermediate       |
| GSC293 | 3.0       | 6.1        | 6.1        | 6.1        |               |              | Sensitive          |
| GSC280 | 2.9       | 6.9        | 6.9        | 6.9        | Splice Site   |              | intermediate       |
| GSC34  | 2.8       | 11.2       | 11.2       | 11.2       |               |              | Resistant          |
| GSC16  | 2.6       | 5.5        | 5.5        | 5.5        |               |              | intermediate       |
| GSC275 | 2.4       | 8.4        | 8.4        | 8.4        | Missense      | D22G         | intermediate       |
| GSC17  | 2.4       | 0.1        | 0.1        | 0.1        | In Frame del  | del198M      | Resistant          |
| GSC240 | 2.4       | 6.0        | 6.0        | 6.0        |               |              | intermediate       |
| GSC248 | 2.3       | 10.5       | 10.5       | 10.5       |               |              | intermediate       |
| GS4-23 | 2.3       | 13.4       | 13.4       | 13.4       | Missense      | M134I        | Sensitive          |
| GSC272 | 2.2       | 5.7        | 5.7        | 5.7        |               |              | Sensitive          |
| GS8-18 | 2.1       | 10.4       | 10.4       | 10.4       |               |              | Sensitive          |
| GSC268 | 2.0       | 6.8        | 6.8        | 6.8        |               |              | Resistant          |
| GSC28  | 1.9       | 8.4        | 8.4        | 8.4        |               |              | Sensitive          |
| GS8-11 | 1.8       | 2.2        | 2.2        | 2.2        |               |              | Sensitive          |
| GS7-15 | 1.7       | 6.9        | 6.9        | 6.9        |               |              | Resistant          |
| GS2-14 | 1.7       | 4.9        | 4.9        | 4.9        |               |              | Sensitive          |
| GSC20  | 1.2       | 7.2        | 7.2        | 7.2        |               |              | Sensitive          |
| GSC231 | 1.2       | 9.5        | 9.5        | 9.5        |               |              | Sensitive          |
| GSC262 | 1.1       | 10.1       | 10.1       | 10.1       |               |              | Sensitive          |
| GSC23  | 0.6       | 16.4       | 16.4       | 16.4       |               |              | Resistant          |
| GS3-28 | 0.4       | 6.6        | 6.6        | 6.6        |               |              | Resistant          |
| GSC11  | 0.2       | 16.7       | 16.7       | 16.7       |               |              | Resistant          |
| GSC285 | 0.0       | 9.8        | 9.8        | 9.8        |               |              | intermediate       |
| GS6-27 | 0.0       | 8.4        | 8.4        | 8.4        |               |              | Resistant          |
| GSC282 | 0.0       | 7.5        | 7.5        | 7.5        |               |              | Sensitive          |
| GSC236 | 0.0       | 10.7       | 10.7       | 10.7       |               |              | Sensitive          |
| GSC267 | 0.0       | 14.3       | 14.3       | 14.3       |               |              | Sensitive          |
| GSC274 | 0.0       | 3.8        | 3.8        | 3.8        |               |              | Sensitive          |

Bold line indicated the median expression value of PTEN (2.5) for all cell lines in this RNAseq experiment based on RPKM values from normalized transcriptome sequencing.

**Table S3, related to all Figures with cell data.**

| Cells                     | FGFR2          | PTEN wild-type | PTEN Y240F | Heter_expr           |
|---------------------------|----------------|----------------|------------|----------------------|
| U87                       | Not detectable | -              | -          | FGFR2, WT-or YF-PTEN |
| HK281                     | +              | -              | -          | WT-or YF-PTEN        |
|                           |                |                |            | Endogenous           |
| TS528                     | +              | +              | -          | FGFR2, WT-PTEN       |
| GBM patient-derived cells | +              | +              | -          | FGFR2, WT-PTEN       |
| Mouse WT primary spheres  | +              | +              | -          | FGFR2, WT-PTEN       |
| Mouse YF primary spheres  | +              | -              | +          | FGFR2, YF-PTEN       |

YF: Y240F mutant PTEN; Heter\_expr: Heterologous expression

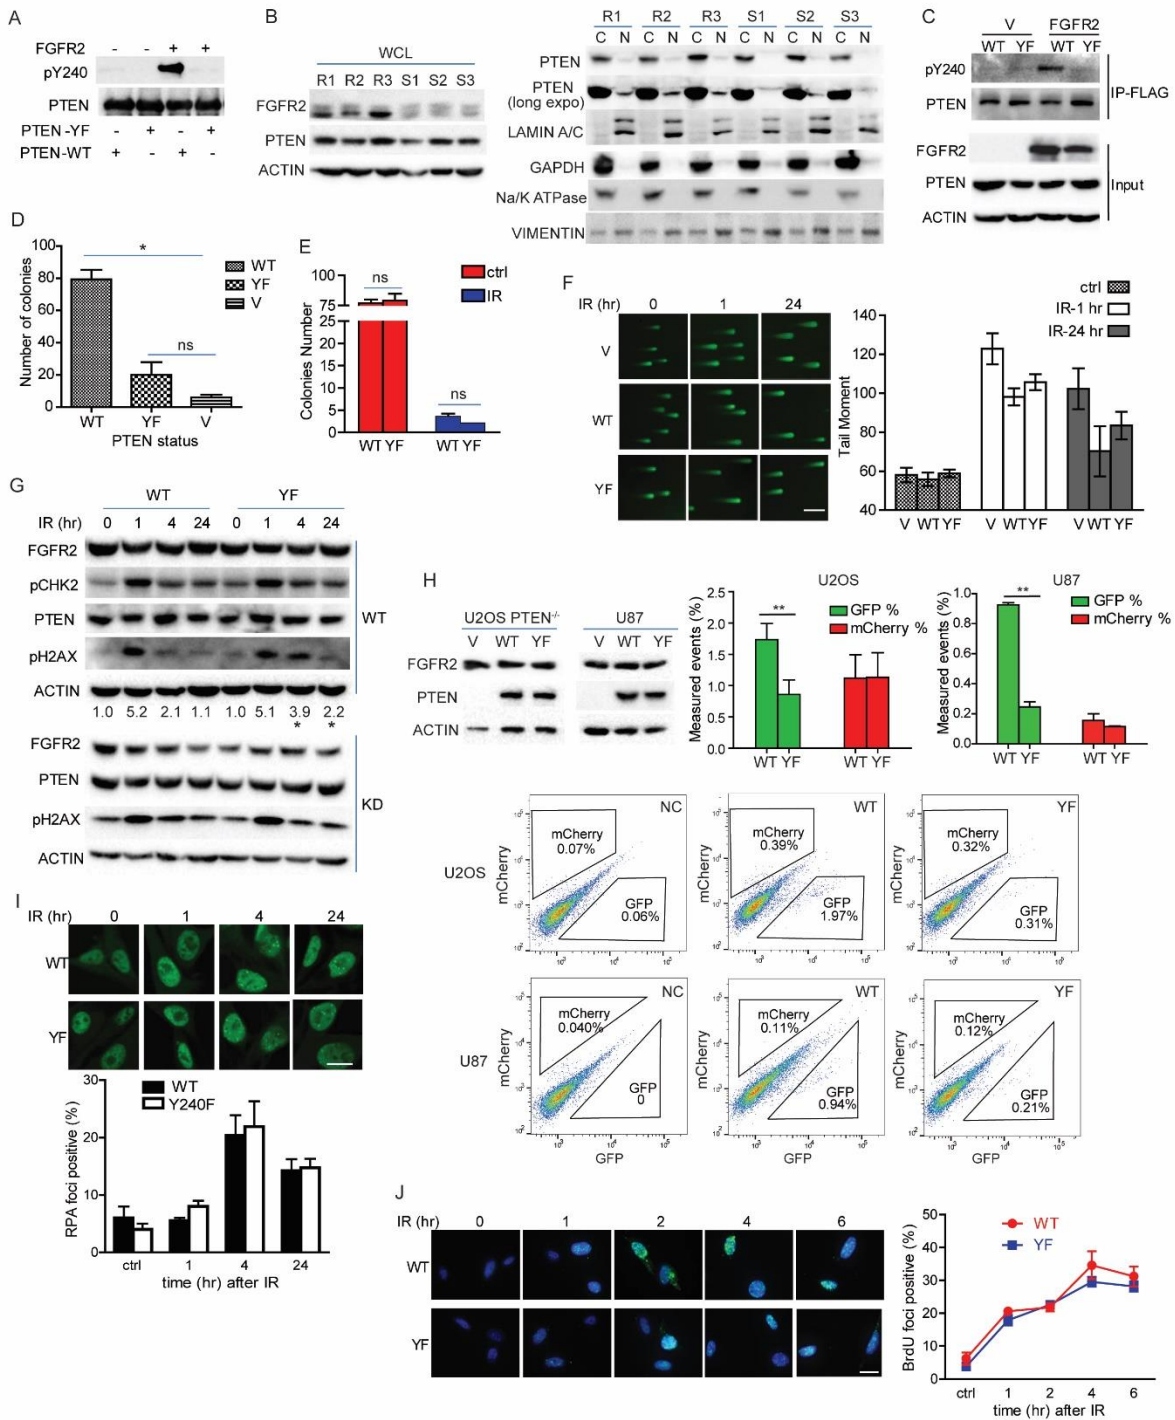

### Figure S1, related to Figure 1

(A) In vitro kinase assay was performed by incubating recombinant FGFR2 with recombinant purified GST-PTEN (WT and Y240F (YF)), followed by probing with anti-pY240-PTEN antibody and PTEN antibody. (B) Three representative cells from radiation sensitive or resistant group (Figure 1D) were analyzed for PTEN expression and localization. Left panel represents PTEN expression level in whole cell lysates; right panel indicates equal cell equivalents of nuclear (N) and cytoplasm (C) fractions from these cells immunoblotted for PTEN and FGFR2. R1-3, 3 radiation resistant cells; S1-3, 3 radiation sensitive cells. (C) U87 cells transfected with FGFR2 or empty vector (V) along with WT- or YF-PTEN were blotted for the presence of pY240-PTEN. (D) Colony numbers from WT-, YF-PTEN cells and vector control (V) cells after treatment with 10 Gy irradiation. (E) Bar graph shows colony numbers of different treatment groups in the absence of FGFR2. (F) Images show comet assay for U87 cells reconstituted with empty vector (V), WT- or YF-PTEN in the absence of FGFR2. Bar graph at right shows quantification of tail moment. Scale bar, 500  $\mu\text{m}$ . (G) Wild type (WT) or kinase dead (KD) FGFR2 was overexpressed in U87 cells reconstituted with WT- or YF-PTEN. Cells were treated with 10 Gy IR and  $\gamma\text{H2AX}$  was examined at indicated times. Numbers at the bottom indicate ratio of  $\gamma\text{H2AX}$  levels relative to time 0 after normalization to actin, calculated as mean  $\pm$  SD from three independent experiments, \* $p < 0.05$  was generated by comparing WT- and YF-PTEN samples at the same time point. (H) U2OS cells CRISPR/Cas9 edited for PTEN or U87 cells were reconstituted with empty vector (V), WT- or YF-PTEN along with FGFR2 (left top). DNA repair efficiency using traffic light assay was determined by flow cytometry, with percentage of GFP-positive cells indicating HR efficiency and mCherry-positive cells indicating NHEJ efficiency. Representative flow plots are shown (bottom) and bar graph indicating quantification of flow cytometry data (right top). NC, negative control, where no DNA damage was induced by I-SceI. (I) WT- or YF-PTEN U87 cells were treated with 10 Gy IR and RPA32 foci were detected at indicated times by immunostaining. Representative images and quantification of foci positive cells are shown. Scale bar, 25  $\mu\text{m}$ . (J) Cells treated and analyzed the same as (I) for BrdU foci. Scale bar, 25  $\mu\text{m}$ . Error bars in this figure represent SD from three independent experiments. ns, not significant, \* $p < 0.05$ , \*\* $p < 0.01$ .

**Table S4, related to Figure 2.**

| Name     | Source                  | Cell type                   | In vitro growth | In vivo growth | FGFR2 | PTEN |
|----------|-------------------------|-----------------------------|-----------------|----------------|-------|------|
| GBM 39   | David James UCSF        | Neurosphere (GBM xenograft) | moderate        | moderate       | -     | +    |
| GBM 6    | David James UCSF        | Neurosphere (GBM xenograft) |                 | slow           | -     | +    |
| GBM 1600 | Dr. Mischel UCLA        |                             | fast            |                | -     | +    |
| HK 281   | Dr. Kornblum UCLA       | Human neurosphere           | fast            | fast           | +     | -    |
| GSC 11   | Fred Lang, MD Anderson  | Glioma stem cell            | fast            |                | -     | -    |
| GSC 23   | Fred Lang, MD Anderson  |                             | fast            |                | +     | -    |
| TS528    | Dr. Brennan MSKCC       | Glioma stem cell            | fast            |                | +     | +    |
| TS543    | Dr. Brennan MSKCC       | Glioma stem cell            | fast            | fast           | -     | +    |
| TS576    | Dr. Brennan MSKCC       | Glioma stem cell            | fast            | fast           | -     | +    |
| TS600    | Dr. Brennan MSKCC       | Glioma stem cell            | fast            | moderate       | -     | -    |
| GSC2     | Erik Sulman MD Anderson | Glioma stem cell            | moderate        | moderate       | +     | +    |
| GS10-6   | Erik Sulman MD Anderson | Glioma stem cell            | slow            |                | +     | +    |

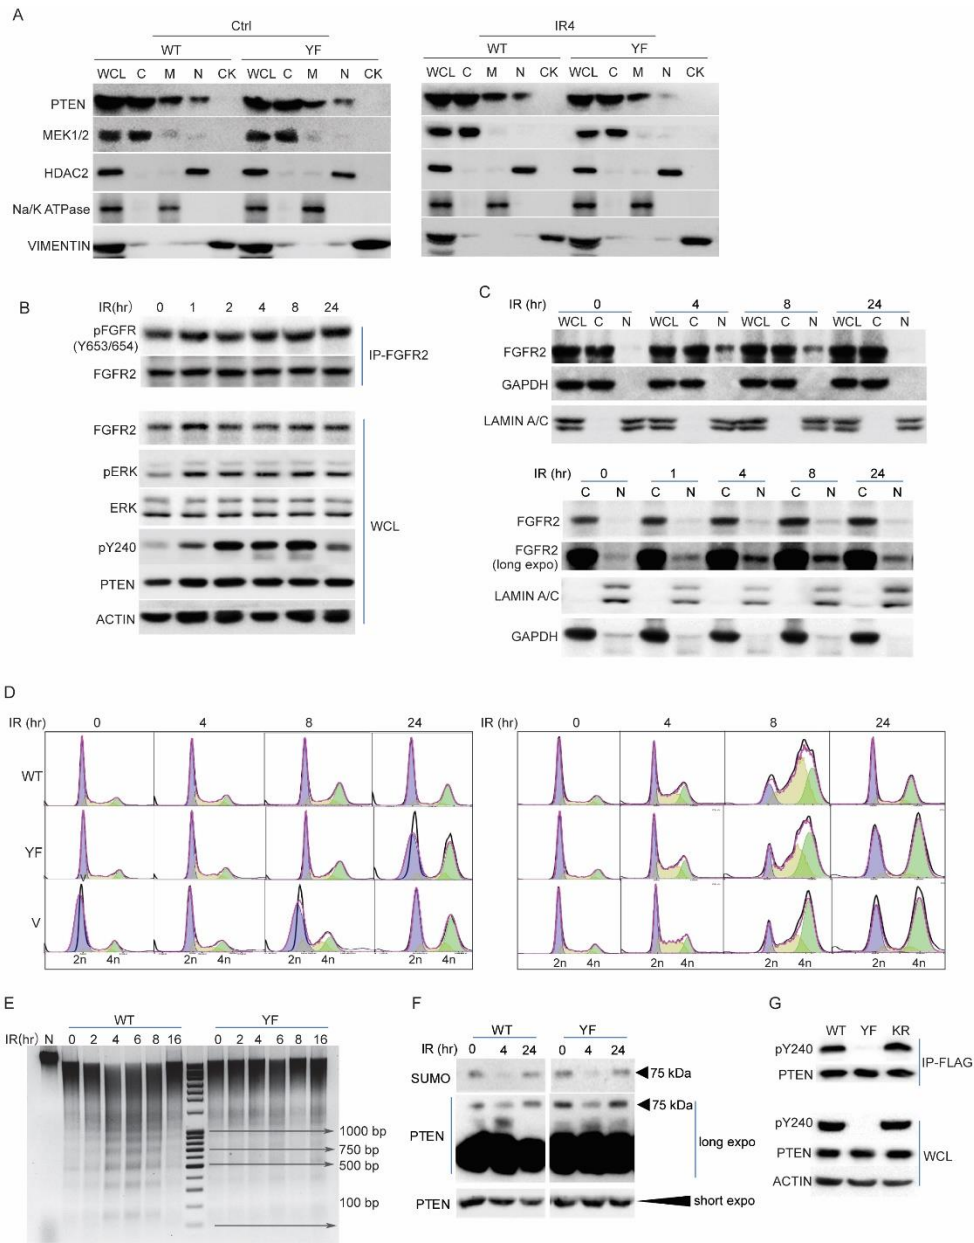

**Figure S2, related to Figure 3**

(A) U87 cells reconstituted with WT-PTEN along with FGFR2 were treated with IR (10 Gy) and then examined for PTEN subcellular localization by western blot. WCL, whole cell lysates, C, cytoplasm, N, nuclear, M, membrane, CK, cytoskeleton. (B) Cells lysates from (A) were prepared followed by immunoprecipitation with anti-FGFR2 antibody and western blot examination of phosphorylation of FGFR2 (Tyr653/654) in IP products and phospho-ERK in whole cell lysates. (C) cytoplasm (C) and nuclear fractions (N) were prepared and were examined for FGFR2. Long expo, longer exposure time. (D) Cell cycle profiles were examined from U87 cells (left) or HK281 cells (right) reconstituted with V or WT- or YF-PTEN along with FGFR2 after IR treatment at the indicated times. (E) Micrococcal nuclease assay was performed using U87 cells reconstituted with WT- or YF-PTEN along with FGFR2 after IR treatment at the indicated times. N, non-IR control. (F) Cells were treated with or without IR at 10 Gy, cell lysates were prepared followed by immunoprecipitation with anti-PTEN antibody. SUMOylation was evaluated by anti-SUMO 2/3 antibody and PTEN-HRP antibody. Long expo, longer exposure time; short expo, shorter exposure time. (G) 293T cells transfected with Flag-tagged WT- or YF- or K254R (KR)-PTEN along with FGFR2 were examined for phosphorylation of Y240 PTEN by western blot.



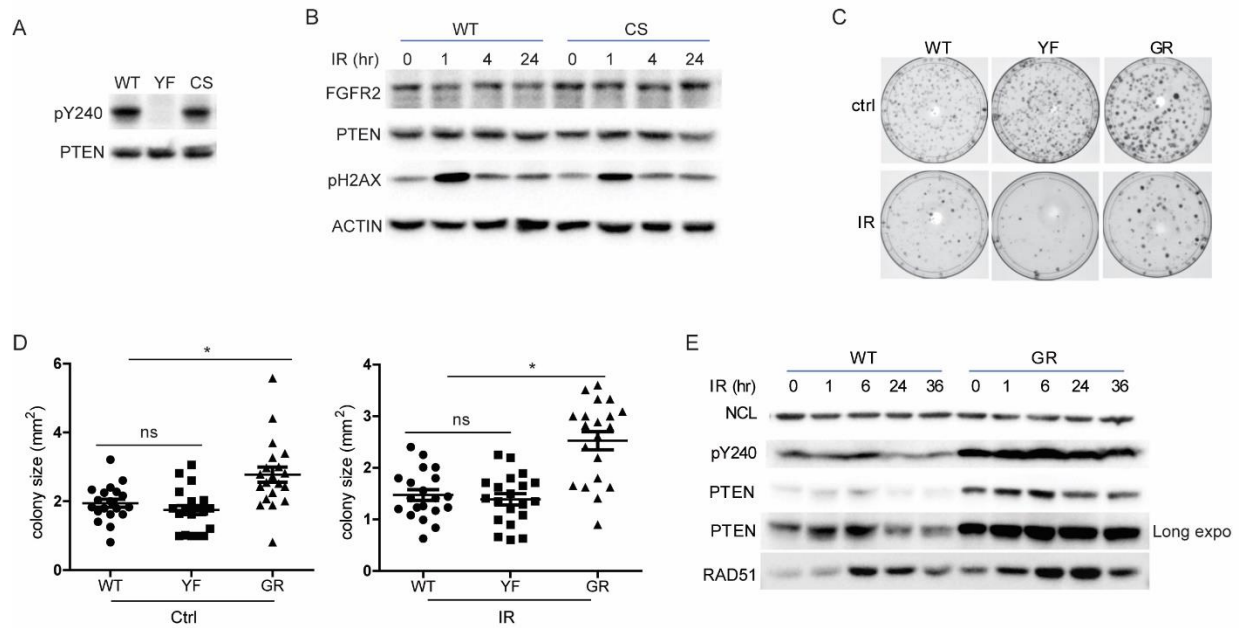

**Figure S3, related to Figure 4**

(A) U87 cells reconstituted with WT-, YF- or C124S (CS)-PTEN were examined for phosphorylation of Y240 PTEN by western blot. (B) Cells from (A) were treated with 10 Gy IR and analyzed for pH2AX at indicated times. (C) U87 cells reconstituted with WT-, YF- or GR-PTEN were treated with 10 Gy IR and were analyzed for colony formation, and representative images are shown. (D) Colony size was determined by Keyence software and graphed as shown. ns, not significant; Data represent mean  $\pm$  SD from three independent experiments. \* $p < 0.05$ . (E) U87 cells reconstituted with WT-, GR-PTEN along with FGFR2 were treated with 10 Gy IR and chromatin-bound protein isolated at indicated times post IR was immunoblotted for pY240 PTEN and RAD51.

A

| Method    | Structure Overlap (%) | RMSD | Fragment Score <sup>1</sup> | Topology Score <sup>2</sup> | Match Size | TM-score | Z-Score |
|-----------|-----------------------|------|-----------------------------|-----------------------------|------------|----------|---------|
| CLICK     | 60.40                 | 2.01 | 0.94                        | 0.24                        | 32         | -        | 5.3     |
| mTM-align | -                     | 2.11 | -                           | -                           | 29         | 0.34     | -       |
| RaptorX   | -                     | 2.41 | -                           | -                           | 22         | 0.30     | -       |
| SPalign   | 60.38                 | 1.96 | -                           | -                           | -          | 0.40     | -       |

B

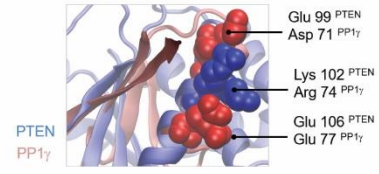

C

PP1 $\gamma$ \_site 58:PLKICGG:63 66:HGQYYDLLRLRF-E YGGFPPE:84 86:NYLFL:90  
 PTEN\_site 65:-YKIYNL:70 95:PPQ-LELI KPFCE DLDQWL:112 120:AAIHC:124

D

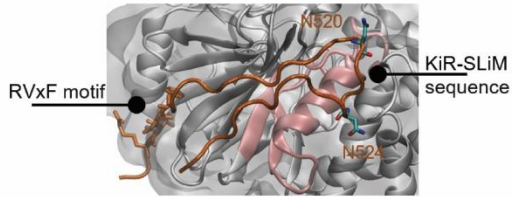

G

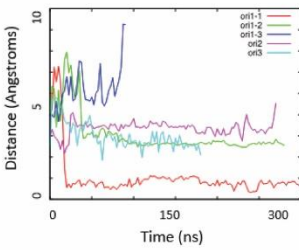

H

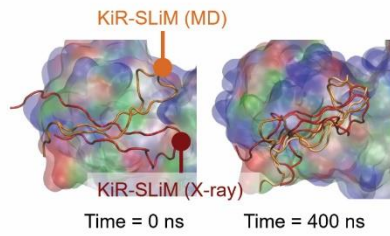

E

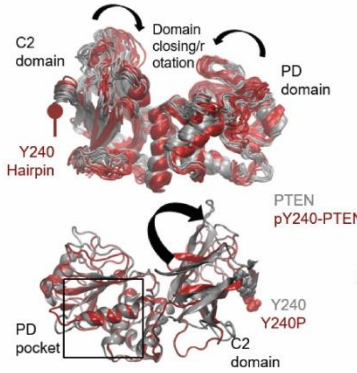

F

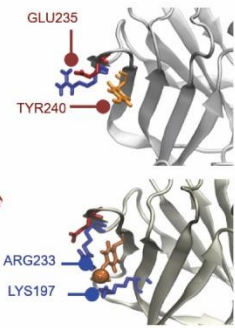

I

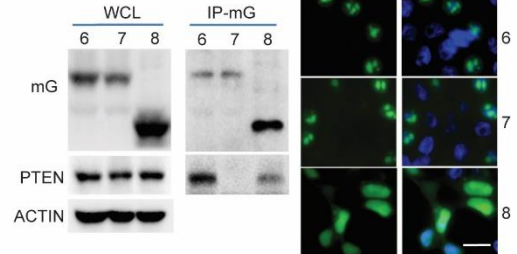

J

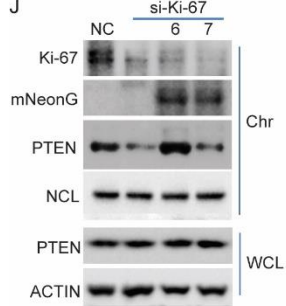

K

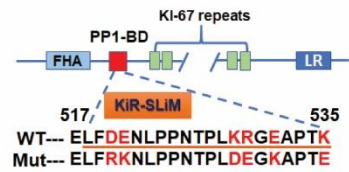

L

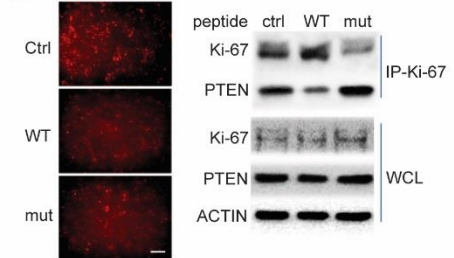

M

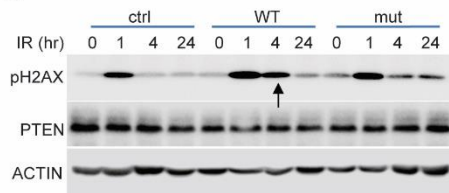

N

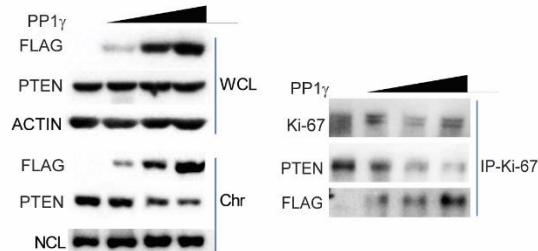

## Figure S4, related to Figure 5

(A) The binding pocket for the KiR-SLiM of PP1 $\gamma$  and PTEN showed high 3D structure similarity ( $<2.5\text{\AA}$ ) according to different structural alignment methods (CLICK, SPalign, RaptorX, mTM-align) according to different structural alignment methods (CLICK, SPalign, RaptorX, mTM-align) (Brown et al., 2016; Dong et al., 2018; Nguyen et al., 2011; Wang et al., 2013). All methods identified a helix motif (B) with a 11-mer sequence of chemically-conserved positions highlighted with a box (C), along with two neighboring beta-sheets, which together form the binding site for Ki-67. Note the identically charged residues in (B). (D) Pose illustrating close-up view of the PP1 $\gamma$  (PDB entry: 5J28) -Ki-67 interaction. Compared with the interaction of pY240-PTEN (Figure 5I), the KiR-SLiM sequence is flipped but retains key asparagines and other polar/charged residues in similar positions within the binding cleft. (E) Comparison of simulations of native (grey) and pY240-PTEN (red) show that phosphorylation favors the closure of the isoprenoid binding cleft (above) and increases the accessibility of the PD binding pocket (below). (F) Close-up view of the TYR240 phosphorylation site. While TYR240 forms stable H-bonds with GLU235 and ARG233 in native PTEN, upon phosphorylation these contacts are broken and substituted by interactions between the negatively charged pTYR240 with LYS197 and ARG233 (right). (G) Multiple short unbiased trajectories in which the Ki-67 fragment was randomly placed around pY240-PTEN were run and then Ki-67 was directly docked in a similar pose as that observed for its interaction with PP1 $\gamma$ . To prepare the pY240-PTEN structure, short MD runs were performed using the unphosphorylated protein as control. Average distance between Ki-67 and the PD binding pockets seen in different replica trajectories for blind docking; The trajectory in red corresponds to the spontaneous binding event of Ki-67 to conserved phosphatase domain pocket shown in Figure 5H, 5I. (H) Comparison of the X-ray guided Ki-67 docking pose (red) with the spontaneous MD complex (orange) at 0 and 400 ns time; note how the KiR-SLiM sequence docked as in the crystal tends to reorient acquiring a similar arrangement as in the simulation complex. (I) Ki-67 truncations 6, 7 and 8 (Figure 5G) was co-transfected with PTEN in 293T cells followed by IP with mNeonGreen nAb and western blotted with mNeonGreen (mG) and PTEN antibody (left panel). Representative images showing the localization of truncations 6, 7 and 8 (right panel). Scale bar, 50  $\mu\text{m}$ . (J) Rescue experiment was performed by expressing Ki-67 truncation 6 and 7 (Figure 5G) in U87-GR-PTEN cells knocked down for Ki-67 (siRNA-2) expression. PTEN chromatin loading was detected by western blot. NC, si-scramble, non-specific control. (K) WT and mutant Ki-67 peptides containing the KiR-SLiM motif were synthesized. (L) GR-PTEN U87 cells transfected with control peptide (R-phycoerythrin, with red fluorescence) alone, or together with Ki-67 peptides (WT or mutant) at 1:5 ratio. Representative pictures indicate the transfection efficiency (left panel). Cell lysates were collected 6 hr after transfection and co-immunoprecipitation was performed using Ki-67 antibody. Western blot (right panel) showed WT peptide transfection decreased PTEN and Ki-67 interaction. wt, wild type Ki-67 peptide; mut, mutant Ki-67 peptide. Scale bar, 500  $\mu\text{m}$  (M) U87 cells reconstituted with WT-PTEN along with FGFR2 were transfected with control, WT or mutant Ki-67 peptides followed by IR (10Gy) treatment. pH2AX was examined at indicated times after IR. (N) U87-GR-PTEN cells were transfected with increasing amount of PP1 $\gamma$  and cell lysates were used to perform co-immunoprecipitation using Ki-67 antibody (right). Chromatin binding of PTEN and PP1 $\gamma$  and interaction between Ki-67 and PTEN or PP1 $\gamma$  were evaluated by western blot (left).

**Table S5, related to Figure 5**

| Simulations                                      | Starting conformation       | Time (ns) | Observed events                                               |
|--------------------------------------------------|-----------------------------|-----------|---------------------------------------------------------------|
| <b>PTEN phosphorylation</b>                      | Native PTEN                 | 250       | Hinge-bending motions of the PD and C2 domains                |
|                                                  | pY240-PTEN                  | 950       | Increased motions with closure of the PD / C2 catalytic cleft |
| <b>PTEN-KI-67 interaction (Blind docking)</b>    | Orientation 1 (3X)          | 325       | Tumbling and docking to PD pockets                            |
|                                                  |                             | 275       | Weak lateral interactions                                     |
|                                                  |                             | 75        | Increasing separation                                         |
| <b>PTEN-KI-67 complex</b>                        | Orientation 2               | 250       | Weak lateral interactions                                     |
|                                                  | Orientation 3               | 175       | Weak lateral interactions                                     |
|                                                  | MD spontaneous complex (2X) | 1075      | Stable binding through KiR-SLiM                               |
|                                                  | X-ray guided complex (2X)   | 400       | Stable binding through KiR-SLiM                               |
|                                                  |                             | 425       | Reorientation to blind-docking pose                           |
| <b>Total simulation time (<math>\mu</math>s)</b> |                             | 5.1       |                                                               |

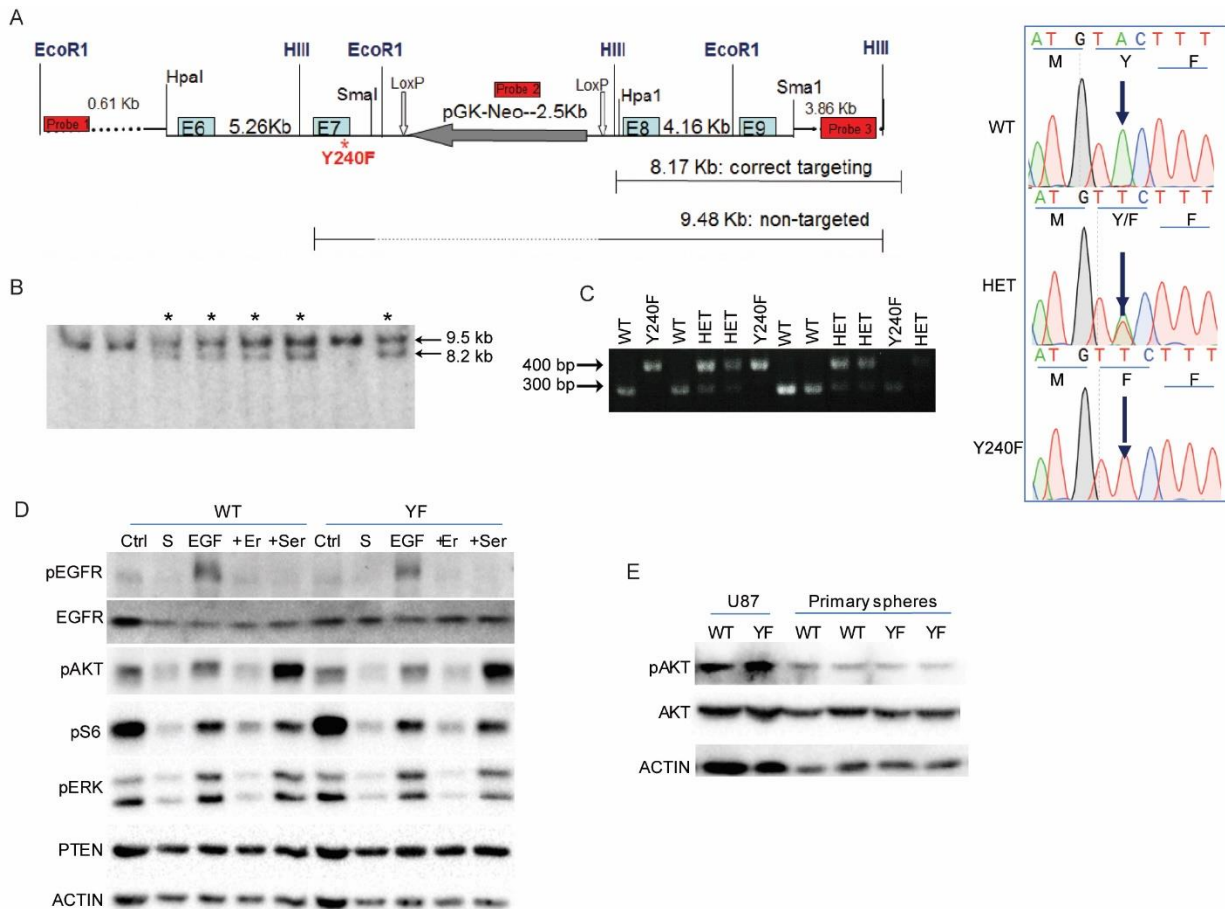

**Figure S5, related to Figure 6.**

(A) Schematic representation of *Cdkn2a* null; Y240F *Pten* knock-in strategy. Box E6, E7, E8, E9 represent *Pten* exons. pGK-Neo-2.5K denotes neomycin resistance selection cassette. Y240F point mutation and Hind III restriction site adjacent to E7 were introduced by PCR in the targeting vector. (B) Southern analysis of ES cell clones. Hind III-digested genomic DNA was hybridized with probe 3. \*Indicates correctly targeted clones, which show the presence of an 8.2 Kb fragment, while 9.5 Kb indicates non-targeted events. (C) Genotyping PCR reactions were performed using tail DNA followed by *RsaI* digestion. WT mice showed a single band of 300 bp, while mice with the Y240F knock-in allele displayed a 400 bp product (loss of *RsaI* restriction site present in WT allele). Genotyping results were ultimately confirmed by sequencing (right). (D) Mouse embryo fibroblasts (MEFs) were prepared from E12.5 WT and Y240F embryos as described (Durkin et al., 2013). Cells were serum starved for 16 hours followed by treatment with EGF, EGF+ 5  $\mu$ M Erlotinib (EGFR inhibitor) or 10% FBS stimulation. Cell lysates were collected 30 min after stimulation and AKT and EGFR-MAPK/ERK pathways activation were examined. S, serum starvation; EGF, 10 ng/mL; +Er, EGF plus 5  $\mu$ M Erlotinib; +ser, stimulated with 10% FBS. (E) Primary neurospheres were prepared as described and PTEN lipid phosphatase activity was compared between WT and Y240F by assessing AKT activation.

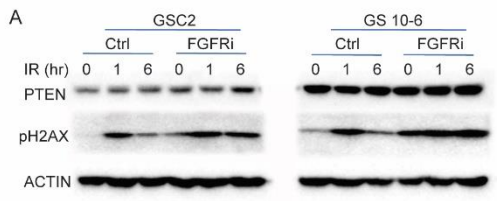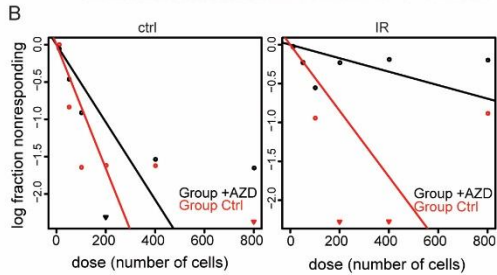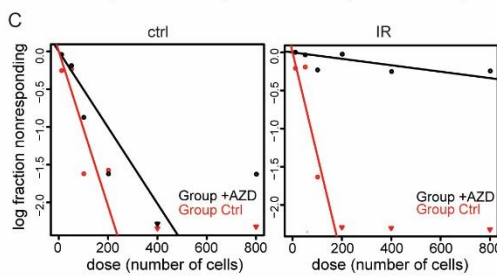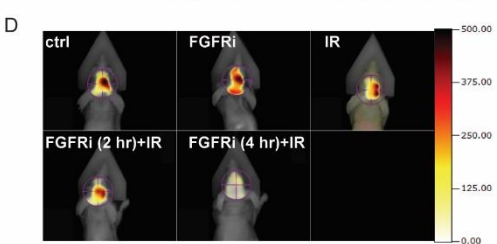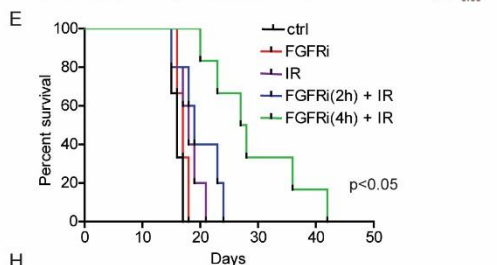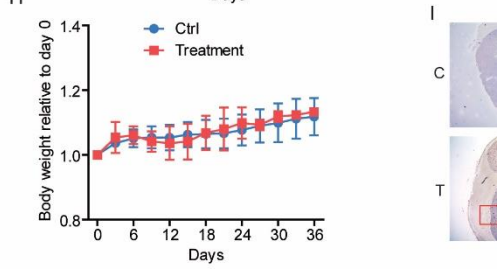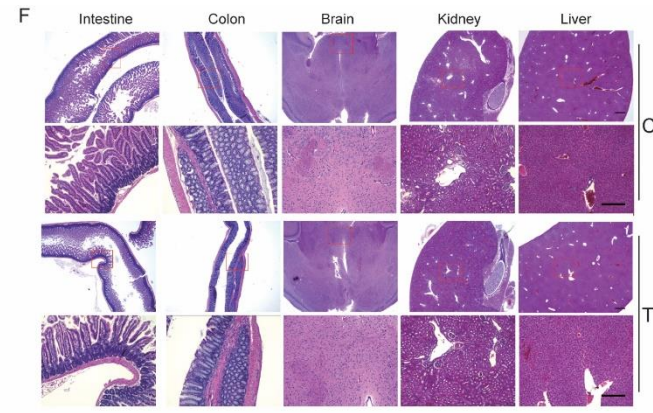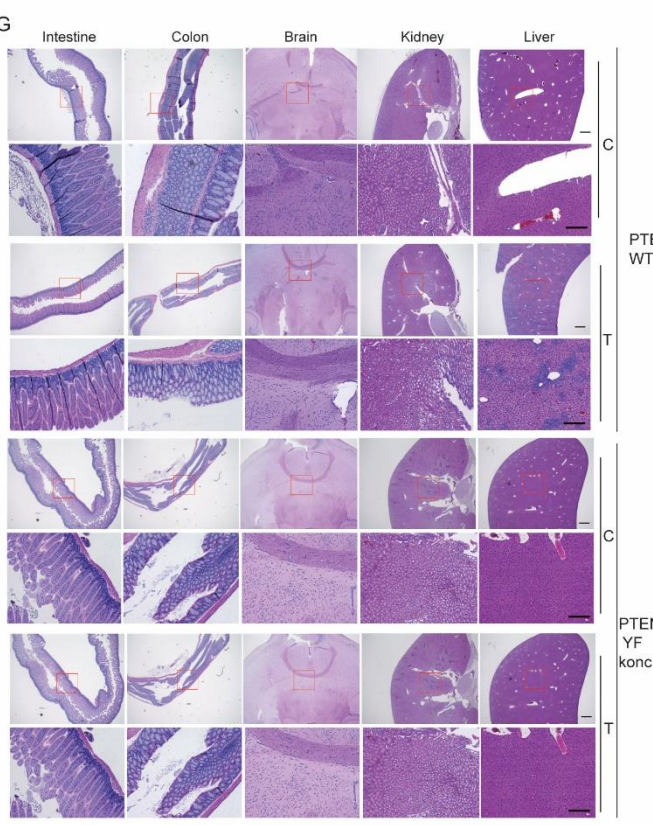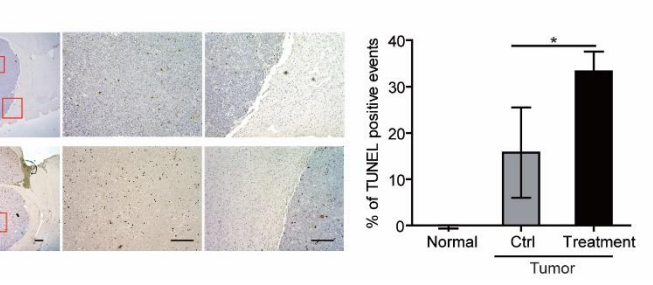

**Figure S6, related to Figure 7.**

(A) GSC2 and GS 10-6 cells were treated with or without FGFR inhibitor, AZD4547 (1  $\mu$ M), for 16 hr and then irradiated at 5 Gy. Cell lysates were prepared for detection of pH2AX by western blot. (B) GS 10-6 cells, pre-treated with or without AZD4547, were irradiated at 5 Gy and were analyzed for survival by limiting dilution assay. (C) GSC2 cells were treated and analyzed as (B). (D) GSC2 cells ( $0.5 \times 10^6$ ) were intracranially injected into immunodeficient mice and after tumor establishment mice were administrated AZD4547 by gavage combined with IR for three cycles starting from day 14 after post engraftment (see Figure 7B). Representative images taken at day 18 are shown. (E) Kaplan-Meier analysis of mice survival are shown. Ctrl, treated with vehicle; FGFRi, treated with 50 mg/Kg AZD4547; IR, treated with 2.5 Gy IR; FGFRi (2 hr)-IR, treated with 2.5 Gy IR after 2 hr of AZD treatment; FGFRi (4 hr)-IR, treated with 2.5 Gy IR after 4 hr of AZD treatment. (F) As in Figure 7B-F, immunodeficient mice (nu/nu), from the same vendor as Figure 7, were subjected to IR treatment four hours after AZD4547 administration for 3 consecutive days. Representative images show H&E staining of sections from major organs 24 hr after last treatment, including intestine, colon, brain, kidney and liver. C, non-treated; T, treated. Scale bar, 200  $\mu$ m. (G) WT- and YF- *Pten* knock-in mice (C57BL/6J) were treated with IR 4 hr after AZD4547 administration for 3 consecutive days. Representative images show H&E staining of sections from major organs 24 hr after treatment, including intestine, colon, brain, kidney and liver. Scale bar, 200  $\mu$ m. (H) Body weight change of mice from (F) was monitored after treatment over time up to 36 days. (I) Immunodeficient mice were orthotopically injected with HK281-WT-PTEN cells ( $2.0 \times 10^5$  cells per mouse). Tumor formed two weeks after injection as monitored by FMT signal. Mice with tumors were treated with IR four hours after AZD4547 administration for 3 consecutive days. Brains were collected 24 hr after treatment followed by TUNEL staining. Bar graph indicates quantification of TUNEL positive cells in tumor area and surrounding normal brain. Scale bar, 100  $\mu$ m. Error bars represent SD from three independent evaluations, \* $p < 0.05$ .

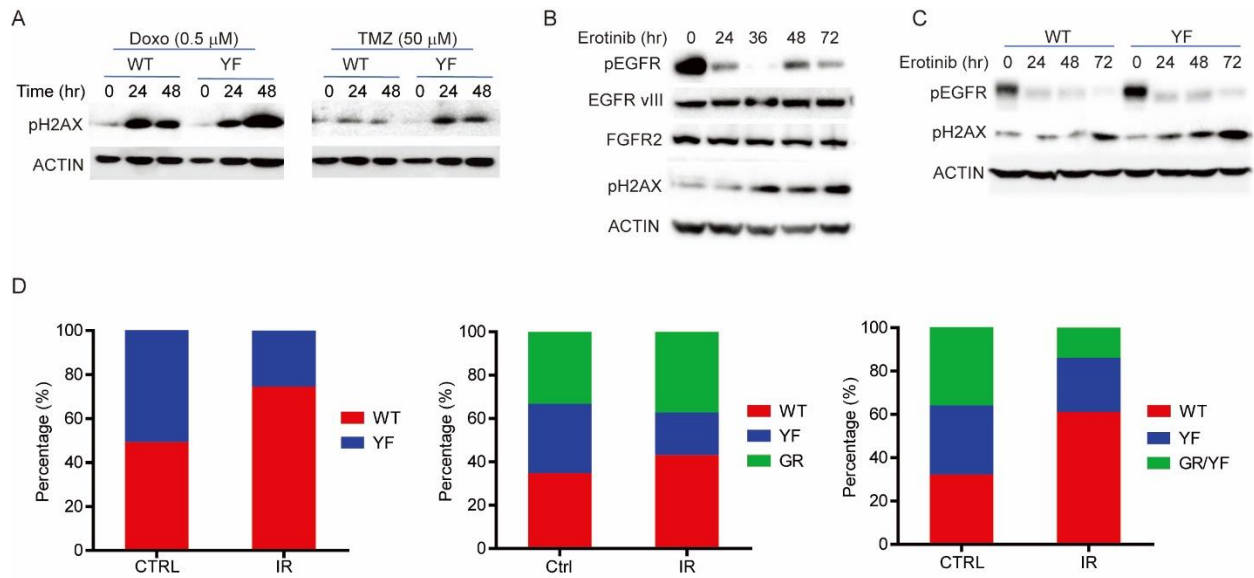

**Figure S7, related to Figure 7.**

(A) U87 cells reconstituted with WT or Y240F PTEN along with FGFR2 were treated with 0.5  $\mu$ M doxorubicin (Dox) or 50  $\mu$ M temozolomide (TMZ) for the indicated time. pH2AX was detected by western blot analysis. (B) GBM39, a patient-derived EGFRvIII-expressing xenograft model, was treated with 5  $\mu$ M EGFR inhibitor, Erlotinib, for the indicated times. (C) U87 cells reconstituted with WT- or YF-PTEN along with EGFRvIII were treated with 5  $\mu$ M Erlotinib for the indicated time. pH2AX was detected by immunoblot analysis. (D) HK281 cells reconstituted with WT-, YF-, GR-, or Y240F/G129R (GR/YF)-PTEN were stably labeled with RFP, BFP, GFP and GFP, respectively, and were mixed in equal ratios as shown. Mixtures were divided into two cultures with one of them being treated with 3 cycles of 5 Gy IR. Cell mixtures were then allowed to grow for 10 days and analyzed by flow cytometry to determine changes in abundance of each cell population. All quantification data represent mean  $\pm$  SD from three independent experiments. \* $p < 0.05$ .
